# Supplementary material for: Sex Differences and Cytokine Profiles among Patients Hospitalized for COVID-19 and during Their Recovery: The Predominance of Adhesion Molecules in Females and Oxidative Stress in Males
Source: MDPI journal article supplement (doi:10.3390/vaccines11101560), 2023-10-03
Supplement: s1 [file s1]

**Table S1.** Number and sex of healthy donors and COVID-19 /post-COVID-19 patients per observed cytokines.

| Cytokines                                        | E-SELECTIN | MCP-1 | IL-10 | P-SELECTIN | ESTRADIOL | TGF- $\beta$ | SHBG | INF- $\gamma$ | TNF- $\alpha$ | VCAM-1 | ICAM-1 | IL-8 | IL-6 | IL-1 $\beta$ | DHT | Testosterone | Free testosterone |
|--------------------------------------------------|------------|-------|-------|------------|-----------|--------------|------|---------------|---------------|--------|--------|------|------|--------------|-----|--------------|-------------------|
| <b>Total At diagnosis</b>                        |            |       |       |            |           |              |      |               |               |        |        |      |      |              |     |              |                   |
| Nº of patients                                   | 71         | 78    | 47    | 49         | 81        | 78           | 70   | 54            | 50            | 55     | 54     | 55   | 56   | 55           | 91  | 13           | 13                |
| <b>Female COVID-19 patients</b>                  |            |       |       |            |           |              |      |               |               |        |        |      |      |              |     |              |                   |
| Nº of patients                                   | 19         | 20    | 20    | 21         | 27        | 20           | 24   | 18            | 18            | 18     | 18     | 19   | 18   | 18           | 27  | 6            | 6                 |
| <b>Male COVID-19 patients</b>                    |            |       |       |            |           |              |      |               |               |        |        |      |      |              |     |              |                   |
| Nº of patients                                   | 52         | 58    | 27    | 28         | 54        | 58           | 46   | 36            | 32            | 36     | 36     | 36   | 38   | 36           | 64  | 7            | 7                 |
| <b>Total 2.5 months after hospital admission</b> |            |       |       |            |           |              |      |               |               |        |        |      |      |              |     |              |                   |
| Nº of patients                                   | 79         | 55    | 55    | 60         | 44        | 58           | 38   | 66            | 41            | 41     | 41     | 66   | 67   | 65           | 69  | 13           | 13                |
| <b>Female post-COVID-19 patients</b>             |            |       |       |            |           |              |      |               |               |        |        |      |      |              |     |              |                   |
| Nº of patients                                   | 27         | 16    | 28    | 28         | 17        | 17           | 15   | 27            | 15            | 15     | 15     | 27   | 27   | 26           | 17  | 6            | 6                 |
| <b>Male post-COVID-19 patients</b>               |            |       |       |            |           |              |      |               |               |        |        |      |      |              |     |              |                   |
| Nº of patients                                   | 52         | 39    | 27    | 32         | 27        | 41           | 23   | 39            | 26            | 26     | 26     | 39   | 40   | 39           | 52  | 7            | 7                 |
| <b>Total 5 months after hospital admission</b>   |            |       |       |            |           |              |      |               |               |        |        |      |      |              |     |              |                   |
| Nº of patients                                   | 48         | 41    | 42    | 35         | 35        | 39           | 22   | 35            | 22            | 22     | 22     | 34   | 34   | 35           | 54  | 14           | 14                |
| <b>Female post-COVID-19 patients</b>             |            |       |       |            |           |              |      |               |               |        |        |      |      |              |     |              |                   |
| Nº of patients                                   | 16         | 13    | 22    | 15         | 15        | 13           | 10   | 15            | 10            | 10     | 9      | 15   | 15   | 15           | 15  | 6            | 6                 |
| <b>Male post-COVID-19 patients</b>               |            |       |       |            |           |              |      |               |               |        |        |      |      |              |     |              |                   |
| Nº of patients                                   | 32         | 28    | 20    | 20         | 20        | 26           | 12   | 20            | 12            | 12     | 13     | 19   | 19   | 20           | 39  | 8            | 8                 |
| <b>Total healthy donors</b>                      |            |       |       |            |           |              |      |               |               |        |        |      |      |              |     |              |                   |
| Nº of donors                                     | 17         | 18    | 18    | 25         | 8         | 19           | 8    | 16            | 19            | 8      | 8      | 22   | 21   | 18           | 8   | 10           | 10                |
| <b>Female healthy donors</b>                     |            |       |       |            |           |              |      |               |               |        |        |      |      |              |     |              |                   |
| Nº of donors                                     | 10         | 10    | 10    | 14         | 4         | 10           | 4    | 9             | 11            | 4      | 4      | 12   | 11   | 10           | 4   | 5            | 5                 |
| <b>Male healthy donors</b>                       |            |       |       |            |           |              |      |               |               |        |        |      |      |              |     |              |                   |
| Nº of donors                                     | 7          | 8     | 8     | 11         | 4         | 9            | 4    | 7             | 8             | 4      | 4      | 10   | 10   | 8            | 4   | 5            | 5                 |

**Table S2.** ELISA kits of applied cytokines.

| <b>ELISA Assay</b>                                                | <b>Units</b> | <b>Cat. No.</b> | <b>Manufacturer</b>                                  |
|-------------------------------------------------------------------|--------------|-----------------|------------------------------------------------------|
| <b>Dihydrotestosterone (DHT)</b>                                  | pg/ml        | E-EL-0031       | Elabsciences Biotechnology Inc.,<br>Houston, Tx, USA |
| <b>E2 (Estradiol)</b>                                             | pg/ml        | E-OSEL-H0005    | Elabsciences Biotechnology Inc.                      |
| <b>Sex hormone binding globulin (SHBG)</b>                        | pmol/ml      | E-EL-H6100      | Elabsciences Biotechnology Inc.                      |
| <b>Interleukin – 6 (IL-6)</b>                                     | pg/ml        | E-EL-H0102      | Elabsciences Biotechnology Inc.                      |
| <b>Interleukin – 10 (IL-10)</b>                                   | pg/ml        | E-EL-H0103      | Elabsciences Biotechnology Inc.                      |
| <b>Interleukin – 1<math>\beta</math> (IL-1<math>\beta</math>)</b> | pg/ml        | E-EL-H0149      | Elabsciences Biotechnology Inc.                      |
| <b>Interleukin – 8 (IL-8)</b>                                     | pg/ml        | E-EL-H6008      | Elabsciences Biotechnology Inc.                      |
| <b>Interferon gamma (IFN-<math>\gamma</math>)</b>                 | $\mu$ g/ml   | E-EL-H0108      | Elabsciences Biotechnology Inc.                      |
| <b>Transforming growth factor beta (TGF-<math>\beta</math>)</b>   | ng/ml        | E-EL-0162       | Elabsciences Biotechnology Inc.                      |
| <b>Tumor necrosis factor alpha (TNF-<math>\alpha</math>)</b>      | pg/ml        | E-EL-H0109      | Elabsciences Biotechnology Inc.                      |
| <b>Monocyte chemoattractant protein-1 (MCP-1)</b>                 | pg/ml        | E-EL-H6005      | Elabsciences Biotechnology Inc.                      |
| <b>Intercellular Adhesion Molecule 1 (ICAM-1)</b>                 | pg/ml        | E-EL-H6114      | Elabsciences Biotechnology Inc.                      |
| <b>Vascular Cell Adhesion Molecule (VCAM-1)</b>                   | $\mu$ g/ml   | E-EL-H5587      | Elabsciences Biotechnology Inc.                      |
| <b>P-selectin</b>                                                 | ng/ml        | E-EL-H0917      | Elabsciences Biotechnology Inc.                      |
| <b>E-selectin</b>                                                 | pg/ml        | E-EL-H0876      | Elabsciences Biotechnology Inc.                      |

**Table S3.** Concentration values for all examined sex hormones, cytokine/chemokines and adhesion molecules in healthy donors, COVID-19 and post-COVID-19 patients.

|                | Sex    | Age | TT<br>nmol/l | Free TT<br>pg/ml | DHT<br>pg/ml | SHBG<br>pmol/ml | EST<br>pg/ml | IL8<br>pg/ml | IL6<br>pg/ml | TNFα<br>pg/ml | INFγ<br>μg/ml | IL10<br>pg/ml | ICAM1<br>μg/ml | VCAM1<br>μg/ml | E-sel<br>pg/ml | P-sel<br>pg/ml | IL1β<br>pg/ml | TGFβ<br>ng/ml | MCP1<br>pg/ml |        |
|----------------|--------|-----|--------------|------------------|--------------|-----------------|--------------|--------------|--------------|---------------|---------------|---------------|----------------|----------------|----------------|----------------|---------------|---------------|---------------|--------|
| Diagnosis      | Male   | AV  | 54.91        | 6.27             | 8.31         | 139.35          | 10.14        | 11.39        | 16.33        | 66.83         | 10.84         | 11.05         | 13.17          | 9.39           | 57.72          | 1430.24        | 8.00          | 9.75          | 3.83          | 586.59 |
|                |        | SD  | 14.38        | 2.58             | 4.44         | 87.63           | 6.50         | 2.42         | 7.76         | 46.65         | 6.71          | 2.41          | 14.56          | 3.51           | 25.76          | 586.06         | 1.25          | 2.11          | 0.98          | 383.16 |
|                |        | M*  | 55           | 6.18             | 8.10         | 122.50          | 7.56         | 11.42        | 14.44        | 55.79         | 9.49          | 10.08         | 9.28           | 8.06           | 55.28          | 1433.57        | 7.84          | 9.74          | 3.93          | 455.71 |
|                | Female | AV  | 61.29        | 0.97             | 1.82         | 111.54          | 22.20        | 10.96        | 19.71        | 49.05         | 41.98         | 12.35         | 17.00          | 12.09          | 64.78          | 1740.26        | 6.77          | 11.4          | 3.67          | 612.93 |
|                |        | SD  | 13.87        | 0.28             | 0.22         | 55.88           | 11.72        | 2.32         | 7.48         | 26.33         | 40.91         | 4.96          | 31.40          | 5.20           | 33.37          | 1187.39        | 1.11          | 3.58          | 0.98          | 402.20 |
|                |        | M*  | 62           | 0.98             | 1.80         | 103.60          | 22.18        | 11.42        | 17.94        | 64.11         | 21.84         | 11.82         | 8.17           | 9.72           | 57.81          | 1661.30        | 7.10          | 10.89         | 3.80          | 567.79 |
| 2.5 months     | Male   | AV  | 55.85        | 13.81            | 19.25        | 96.61           | 6.72         | 12.62        | 17.17        | 36.66         | 9.22          | 11.15         | 5.71           | 18.58          | 75.42          | 1766.87        | 6.50          | 9.63          | 4.06          | 563.52 |
|                |        | SD  | 14.30        | 4.31             | 6.87         | 66.48           | 8.54         | 2.78         | 7.31         | 46.35         | 0.91          | 1.49          | 4.71           | 3.59           | 34.28          | 792.66         | 2.03          | 0.82          | 2.70          | 270.44 |
|                |        | M*  | 55.5         | 13.55            | 19.75        | 105.00          | 3.09         | 12.70        | 15.24        | 26.87         | 9.35          | 11.44         | 4.28           | 18.73          | 73.52          | 1524.17        | 6.43          | 9.79          | 3.66          | 528.71 |
|                | Female | AV  | 61.28        | 0.84             | 2.00         | 81.86           | 27.17        | 12.73        | 14.69        | 48.82         | 9.19          | 5.36          | 7.51           | 23.13          | 54.48          | 2761.94        | 5.51          | 9.49          | 3.70          | 899.58 |
|                |        | SD  | 12.57        | 0.58             | 0.49         | 39.31           | 9.23         | 2.68         | 4.80         | 49.42         | 0.43          | 3.70          | 11.98          | 5.03           | 26.75          | 992.75         | 1.44          | 0.83          | 2.48          | 481.34 |
|                |        | M*  | 62           | 0.84             | 2.00         | 101.16          | 26.21        | 12.54        | 15.15        | 21.72         | 9.26          | 2.99          | 4.72           | 23.28          | 44.12          | 2781.67        | 5.20          | 9.78          | 2.97          | 789.26 |
| 5 months       | Male   | AV  | 54.54        | 14.47            | 26.46        | 129.78          | 6.24         | 12.26        | 15.02        | 32.53         | 8.79          | 10.73         | 4.77           | 18.12          | 71.23          | 2118.53        | 6.56          | 9.49          | 3.88          | 575.00 |
|                |        | SD  | 17.10        | 5.17             | 9.84         | 78.64           | 6.54         | 3.15         | 5.25         | 33.20         | 1.15          | 2.01          | 2.02           | 3.96           | 39.31          | 1100.43        | 2.44          | 0.89          | 2.88          | 388.97 |
|                |        | M*  | 56.5         | 14.79            | 22.40        | 113.11          | 4.97         | 11.96        | 13.85        | 25.29         | 9.14          | 11.59         | 4.53           | 18.50          | 57.62          | 1770.88        | 6.08          | 9.79          | 2.79          | 456.00 |
|                | Female | AV  | 61.36        | 0.56             | 1.63         | 76.52           | 21.51        | 13.90        | 17.00        | 18.70         | 9.23          | 10.89         | 4.68           | 21.31          | 34.29          | 2829.51        | 5.42          | 9.81          | 3.52          | 528.71 |
|                |        | SD  | 10.65        | 0.30             | 0.29         | 36.29           | 7.51         | 2.25         | 5.22         | 21.27         | 0.32          | 1.51          | 2.02           | 4.29           | 36.47          | 1013.05        | 1.57          | 1.18          | 2.41          | 182.02 |
|                |        | M*  | 62           | 0.58             | 1.70         | 85.23           | 23.79        | 13.59        | 16.81        | 9.58          | 9.29          | 11.61         | 4.72           | 21.44          | 23.94          | 2627.67        | 4.88          | 9.79          | 2.75          | 599.33 |
| Healthy donors | Male   | AV  | 41.18        | 19.53            | 29.84        | 169.76          | 3.20         | 12.28        | 8.39         | 12.25         | 5.90          | 8.45          | 6.97           | 7.38           | 36.48          | 1927.14        | 5.25          | 15.18         | 9.98          | 449.25 |
|                |        | SD  | 12.39        | 9.09             | 7.61         | 68.13           | 0.95         | 1.22         | 2.77         | 3.85          | 0.93          | 0.51          | 7.18           | 1.66           | 6.84           | 617.61         | 1.85          | 17.17         | 5.26          | 194.25 |
|                |        | M*  | 41           | 17.60            | 29.48        | 170.24          | 2.82         | 12.23        | 7.82         | 13.66         | 5.83          | 8.37          | 5.00           | 7.42           | 34.85          | 2049           | 4.00          | 9.56          | 11.58         | 478.86 |
|                | Female | AV  | 35.15        | 1.10             | 2.13         | 62.38           | 14.11        | 11.48        | 10.86        | 20.44         | 7.49          | 9.01          | 4.41           | 7.13           | 49.98          | 1514.40        | 5.40          | 9.55          | 9.29          | 313.80 |
|                |        | SD  | 10.10        | 0.37             | 0.60         | 26.62           | 9.50         | 0.94         | 4.68         | 19.93         | 2.85          | 0.91          | 1.20           | 0.81           | 13.24          | 787.98         | 1.94          | 1.68          | 3.65          | 112.11 |
|                |        | M*  | 35           | 1.17             | 1.99         | 56.08           | 10.24        | 11.23        | 9.26         | 13.95         | 6.07          | 9.13          | 4.37           | 7.07           | 48.90          | 1520.17        | 5.64          | 8.97          | 9.96          | 289.50 |

TT – testosterone, EST – Estradiol, sel – selectin, M\* - Median

**Table S4.** The complete blood count test of COVID-19 patients at diagnosis and clinical follow-up.

| COVID19      | Sex    |    | RBC<br>x10 <sup>12</sup> /L | HGB<br>g/L          | HCT<br>L/L        | MCV<br>fL          | MCH<br>pg | MCHC<br>g/L        | RDW<br>%          | WBC<br>x10 <sup>9</sup> /L | LYMPH<br>%         | NEUT<br>%          | MONO<br>%         | MPV<br>fL         | PLT<br>x10 <sup>9</sup> /L |
|--------------|--------|----|-----------------------------|---------------------|-------------------|--------------------|-----------|--------------------|-------------------|----------------------------|--------------------|--------------------|-------------------|-------------------|----------------------------|
| Diagnosis    | Male   | AV | 4.79                        | 143.79              | 0.42              | 87.87              | 29.94     | 340.79             | 12.70             | 7.31                       | 17.72              | 73.88              | 7.70              | 9.99              | 219.74                     |
|              |        | SD | 0.57                        | 13.03               | 0.04              | 4.24               | 1.55      | 8.75               | 1.20              | 3.52                       | 9.77               | 11.91              | 4.92              | 0.68              | 106.39                     |
|              |        | M* | 4.84                        | 145.00              | 0.43              | 87.90              | 29.90     | 340.00             | 12.40             | 6.50                       | 15.90              | 73.9               | 6.4               | 10.05             | 194                        |
|              | Female | AV | 4.40                        | 130.10              | 0.61              | 87.98              | 29.65     | 336.85             | 13.07             | 6.01                       | 21.67              | 70.60              | 6.75              | 9.96              | 216.54                     |
|              |        | SD | 0.49                        | 13.06               | 1.42              | 3.72               | 1.57      | 8.57               | 1.78              | 2.65                       | 9.48               | 10.77              | 2.87              | 0.96              | 86.74                      |
|              |        | M* | 4.43                        | 130                 | 0.383             | 87.65              | 29.7      | 336.5              | 12.8              | 5.55                       | 19.75              | 72.15              | 6.35              | 9.75              | 212.5                      |
| 2.5 months   | Male   | AV | 4.83                        | 145.83              | 0.43              | 89.38 <sup>1</sup> | 30.34     | 339.4 <sup>2</sup> | 13.3 <sup>3</sup> | 7.06                       | 29.7 <sup>3</sup>  | 57.25 <sup>3</sup> | 8.74 <sup>2</sup> | 11.26             | 255.64 <sup>2</sup>        |
|              |        | SD | 0.50                        | 11.64               | 0.03              | 4.60               | 1.70      | 10.55              | 1.18              | 2.46                       | 9.56               | 10.65              | 2.27              | 10.92             | 149.00                     |
|              |        | M* | 4.86                        | 146.00              | 0.43              | 89.05              | 30.15     | 338.00             | 13.15             | 6.60                       | 30.05              | 56.65              | 8.70              | 9.85              | 233.50                     |
|              | Female | AV | 4.44                        | 133.19              | 0.40              | 90.36 <sup>1</sup> | 30.09     | 332.9 <sup>1</sup> | 13.33             | 6.22                       | 32.74 <sup>3</sup> | 55.91 <sup>3</sup> | 8.19 <sup>1</sup> | 10.03             | 284.19 <sup>3</sup>        |
|              |        | SD | 0.44                        | 9.89                | 0.03              | 4.05               | 1.46      | 7.08               | 1.06              | 1.65                       | 7.10               | 8.06               | 1.76              | 0.84              | 96.33                      |
|              |        | M* | 4.55                        | 135.00              | 0.40              | 90.70              | 30.20     | 332.00             | 13.10             | 6.50                       | 32.90              | 56.00              | 8.00              | 10.10             | 264.00                     |
| 5 months     | Male   | AV | 5.03 <sup>1</sup>           | 150.42 <sup>2</sup> | 0.44 <sup>2</sup> | 88.73              | 30.03     | 338.19             | 12.95             | 6.82                       | 31.84 <sup>3</sup> | 56.17 <sup>3</sup> | 8.91 <sup>2</sup> | 9.92 <sup>3</sup> | 232.7 <sup>3</sup>         |
|              |        | SD | 0.51                        | 11.63               | 0.03              | 4.16               | 1.70      | 10.00              | 1.84              | 1.41                       | 9.38               | 9.54               | 2.51              | 0.83              | 56.67                      |
|              |        | M* | 5.04                        | 150.00              | 0.45              | 88.30              | 29.85     | 338.00             | 12.75             | 6.65                       | 30.65              | 57.75              | 9.05              | 9.70              | 232.7                      |
|              | Female | AV | 4.65 <sup>1</sup>           | 137.72 <sup>1</sup> | 0.41              | 88.54              | 29.62     | 334.56             | 13.00             | 6.53                       | 31.13 <sup>3</sup> | 59.02 <sup>3</sup> | 7.11              | 9.96 <sup>3</sup> | 257.1 <sup>3</sup>         |
|              |        | SD | 0.39                        | 11.57               | 0.03              | 3.39               | 1.40      | 7.82               | 0.98              | 2.30                       | 7.28               | 8.51               | 1.78              | 0.85              | 62.84                      |
|              |        | M* | 4.73                        | 137.50              | 0.41              | 88.40              | 29.60     | 334.50             | 12.75             | 6.10                       | 31.80              | 57.25              | 7.20              | 9.75              | 257.12                     |
| Normal range |        |    | 4.34-5.72                   | 138-175             | 0.415-0.53        | 80-100             | 27.4-33.9 | 320-360            | 12-15.5           | 3.4-9.7                    | 20-46              | 44-72              | 2-12              | 6.8-10.4          | 158-424                    |

<sup>1</sup>p<0.05; <sup>2</sup>p<0.01; <sup>3</sup>p<0.001 vs. values at diagnosis, M\* - Median

**Table S5.** Spearman correlation of biochemical parameters with the levels of inflammatory cytokines, chemokines, cell adhesion factors and sex hormones in the examined COVID-19 and post-COVID-19 male and female patients.

| Spearman's r  | Sex | INR                | PTS               | UREA               | Creatinine         | CK                          | D-dimer            | CRP                | AST               | ALT                | GGT                | Fibrinogen         | LDH                                      | Vaccine                                  | CO                | Co-M                                   |
|---------------|-----|--------------------|-------------------|--------------------|--------------------|-----------------------------|--------------------|--------------------|-------------------|--------------------|--------------------|--------------------|------------------------------------------|------------------------------------------|-------------------|----------------------------------------|
| E-SELEKTIN    | F   | -.758 <sup>2</sup> |                   |                    |                    | -.762 <sup>1</sup>          |                    |                    |                   |                    |                    |                    | -.490 <sup>2</sup><br>-.875 <sup>2</sup> | .563                                     |                   |                                        |
|               | M   |                    |                   |                    |                    |                             |                    |                    | .543 <sup>2</sup> |                    |                    |                    |                                          | .407 <sup>2</sup>                        |                   |                                        |
|               | T   |                    |                   |                    |                    | -.246                       |                    |                    | -.314             |                    | -.29               |                    | -.301                                    | .267                                     |                   | .272<br>.274 <sup>1</sup>              |
| P-SELEKTIN    | F   |                    |                   |                    | .586 <sup>1</sup>  |                             |                    |                    | .486              | .655               | .514               | -.627              |                                          |                                          |                   |                                        |
|               | M   |                    |                   |                    |                    |                             |                    |                    |                   |                    |                    |                    |                                          | -.462 <sup>2</sup>                       |                   | -.503 <sup>2</sup>                     |
|               | T   |                    |                   |                    |                    | .523 <sup>2</sup>           |                    |                    |                   | .326               |                    |                    |                                          |                                          |                   |                                        |
| VCAM-1        | F   |                    |                   |                    |                    |                             |                    |                    |                   | .567 <sup>1</sup>  |                    |                    | -.731 <sup>2</sup>                       |                                          |                   | .529                                   |
|               | M   |                    |                   |                    | .639 <sup>2</sup>  |                             |                    |                    |                   |                    | .762 <sup>2</sup>  | .383 <sup>2</sup>  |                                          | .606 <sup>1</sup>                        | .457 <sup>1</sup> |                                        |
|               | T   |                    |                   |                    | .569 <sup>2</sup>  |                             |                    |                    | .569 <sup>2</sup> | .573 <sup>2</sup>  | .589 <sup>2</sup>  |                    |                                          |                                          | .417 <sup>1</sup> |                                        |
| ICAM-1        | F   |                    |                   |                    |                    |                             |                    |                    |                   |                    |                    |                    |                                          | -.554 <sup>1</sup>                       |                   |                                        |
|               | M   |                    | .576              |                    |                    |                             |                    |                    |                   |                    |                    |                    |                                          | .45 <sup>1</sup>                         |                   |                                        |
|               | T   |                    |                   |                    | -.451 <sup>1</sup> |                             |                    |                    |                   |                    |                    |                    |                                          |                                          |                   |                                        |
| ESTRADIOL     | F   | .634 <sup>1</sup>  | .659 <sup>1</sup> | .672 <sup>1</sup>  | .620 <sup>1</sup>  | .636 <sup>1</sup>           |                    |                    |                   |                    |                    |                    |                                          |                                          |                   |                                        |
|               | M   |                    |                   | .754 <sup>2</sup>  |                    |                             |                    |                    |                   |                    |                    |                    |                                          |                                          |                   | .526 <sup>1</sup><br>.522 <sup>2</sup> |
|               | T   |                    |                   |                    |                    | .350 <sup>1</sup>           |                    |                    |                   |                    |                    |                    |                                          |                                          |                   |                                        |
| DHT           | F   |                    |                   |                    |                    | .473                        |                    |                    |                   |                    |                    |                    | .447                                     |                                          | .439              |                                        |
|               | M   |                    |                   |                    | -.269              |                             |                    |                    |                   |                    |                    |                    |                                          |                                          |                   | .281                                   |
|               | T   |                    |                   |                    |                    | .309<br>.365 <sup>2</sup>   | -.349 <sup>2</sup> | -.283 <sup>2</sup> |                   |                    |                    |                    |                                          | .349 <sup>1</sup>                        |                   |                                        |
| SHBG          | F   | -.545              |                   |                    | -.496 <sup>1</sup> | -.489                       |                    |                    |                   |                    |                    |                    | -.568 <sup>1</sup>                       |                                          |                   |                                        |
|               | M   |                    |                   |                    | -.311              |                             |                    |                    |                   |                    |                    | -.778 <sup>2</sup> |                                          |                                          |                   |                                        |
|               | T   |                    |                   |                    |                    | -.386<br>-.396 <sup>1</sup> |                    |                    |                   |                    | -.472 <sup>1</sup> |                    |                                          |                                          |                   | .362                                   |
| INF- $\gamma$ | F   |                    |                   | -.762 <sup>2</sup> | .535 <sup>1</sup>  |                             |                    |                    |                   |                    |                    | .486 <sup>1</sup>  |                                          |                                          |                   |                                        |
|               | M   |                    |                   |                    |                    | -.407                       | -.626 <sup>2</sup> |                    |                   |                    |                    |                    |                                          | -.338 <sup>1</sup><br>-.451 <sup>2</sup> |                   |                                        |
|               | T   |                    |                   |                    | .405 <sup>1</sup>  | -.337                       |                    |                    |                   |                    |                    |                    |                                          |                                          |                   | .34                                    |
| TNF- $\alpha$ | F   |                    |                   |                    |                    |                             |                    |                    |                   |                    | -.74 <sup>1</sup>  |                    |                                          |                                          |                   |                                        |
|               | T   |                    |                   |                    |                    |                             |                    |                    |                   | -.398 <sup>1</sup> |                    |                    |                                          |                                          |                   |                                        |
| IL-10         | F   |                    |                   | .683 <sup>1</sup>  |                    |                             | .857 <sup>2</sup>  |                    |                   |                    |                    |                    |                                          | .596 <sup>2</sup>                        |                   |                                        |
|               | T   |                    |                   |                    |                    |                             |                    |                    |                   | -.518 <sup>2</sup> |                    |                    |                                          |                                          |                   |                                        |

|       |   |                    |                                      |                         |  |  |
|-------|---|--------------------|--------------------------------------|-------------------------|--|--|
| IL-6  | F | .518               |                                      |                         |  |  |
|       | M | -.594 <sup>2</sup> |                                      |                         |  |  |
|       | T | .529 <sup>2</sup>  | -.553 <sup>2</sup> .489 <sup>2</sup> |                         |  |  |
| IL-1β | F | .571 <sup>1</sup>  |                                      |                         |  |  |
|       | M | -.546 <sup>1</sup> | .364 <sup>1</sup>                    |                         |  |  |
|       | T | -.463 <sup>1</sup> |                                      |                         |  |  |
| MCP-1 | F | .604               |                                      |                         |  |  |
|       | M | .390 <sup>1</sup>  | 0.497 <sup>2</sup>                   |                         |  |  |
|       | T | .425 <sup>1</sup>  | 0.483 <sup>2</sup> .389 <sup>2</sup> |                         |  |  |
| TGF-β | M | -.466              |                                      |                         |  |  |
|       | T | .40 <sup>2</sup>   | .453 <sup>2</sup>                    | .288 <sup>1</sup> -.243 |  |  |
| IL-8  | F | -.52               |                                      |                         |  |  |
|       | M | -.381              | -.449 <sup>2</sup>                   |                         |  |  |
|       | T | -.381 <sup>2</sup> | .368 .289                            |                         |  |  |

<sup>1</sup>After first control (2.5 months); <sup>2</sup>After second control (5 months) of hospital admission; No superscript (at diagnosis). F-female, M-male, T-total.  
CO – Clinical outcome, Co-M – Comorbidities.
